# Supplementary material for: Significant Effects of Antiretroviral Therapy on Global Gene Expression in Brain Tissues of Patients with HIV-1-Associated Neurocognitive Disorders
Source: PLoS Pathog. 2011 Sep 1;7(9):e1002213. doi: 10.1371/journal.ppat.1002213 (PMC3164642; doi:10.1371/journal.ppat.1002213)
Supplement: Table S4 — HAND and ART GO pathways vs. controls. The Table shows an extended list of significantly altered GO pathways in untreated HAND vs. control (sheet 1), ART vs. control (sheet 2), and ARTa vs. control (sheet 3); all as defined by Gazer software. Significance of change in GO pathways was determined by Z-score, p-and q-values, and Bonferroni correction value; the data shown is delimited by Z-scores. (XLS) [file ppat.1002213.s006.xls]

## Sheet: HAND
Supplementary Table S4: Gene ontology (GO) pathways as defined by Gazer software in untreated HAND vs control (sheet 1), ART vs control (sheet 2), and ARTa vs control (sheet 3).
UP-REGULATED PATHWAYS						DOWN-REGULATED PATHWAYS
HAND
NAME	Z-SCORE	P-VALUE	q-VALUE	Bonferroni		NAME	Z-SCORE	P-VALUE	q-VALUE	Bonferroni
immune response	14.6246	0	0	0		synaptic transmission	-9.02305	0	0	0
antigen presentation, endogenous antigen	11.8798	0	0	0		potassium ion transport	-6.58346	0	0	2e-08
antigen processing, endogenous antigen via MHC class I	10.1082	0	0	0		neurogenesis	-6.38169	0	0	6e-08
antigen presentation, exogenous antigen	9.48232	0	0	0		ion transport	-5.85467	0	8e-08	1.65e-06
antigen processing, exogenous antigen via MHC class II	8.95427	0	0	0		homophilic cell adhesion	-5.78924	1e-08	1e-07	2.44e-06
inflammatory response	8.5136	0	0	0		cation transport	-5.78873	1e-08	1e-07	2.45e-06
response to virus	8.0736	0	0	0		oxygen transport	-5.75836	1e-08	1.1e-07	2.93e-06
complement activation, classical pathway	6.3495	0	0	7e-08		signal transduction	-5.3974	7e-08	8.2e-07	2.333e-05
ubiquitin-dependent protein catabolism	5.25021	1.5e-07	1.73e-06	5.24e-05		calcium ion transport	-4.91592	8.8e-07	9.49e-06	0.00030486
protein folding	4.80028	1.58e-06	1.46e-05	0.00054664		cell differentiation	-4.82307	1.41e-06	1.438e-05	0.00048772
antigen presentation	4.49258	7.04e-06	5.56e-05	0.00242756		sodium ion transport	-4.80617	1.54e-06	1.458e-05	0.00053079
cell surface receptor linked signal transduction	4.46254	8.1e-06	6.02e-05	0.00279428		neuropeptide signaling pathway	-4.63208	3.62e-06	3.181e-05	0.00124895
positive regulation of I-kappaB kinase/NF-kappaB cascade	4.40626	1.05e-05	7.53e-05	0.00362834		neurotransmitter secretion	-4.62041	3.83e-06	3.219e-05	0.00132131
ER to Golgi transport	4.14493	3.4e-05	0.00023467	0.0117273		cell adhesion	-4.48784	7.19e-06	5.563e-05	0.00248224
nuclear mRNA splicing, via spliceosome	3.89201	9.94e-05	0.00058235	0.0342988		calcium-dependent cell-cell adhesion	-4.06868	4.728e-05	0.00031515	0.0163114
RNA catabolism	3.70045	0.00021522	0.0012236	0.0742508		feeding behavior	-4.02387	5.725e-05	0.000367	0.0197509
spliceosome assembly	3.65262	0.00025957	0.00137225	0.089553		neurotransmitter transport	-4.01735	5.886e-05	0.000367	0.0203056
apoptosis	3.6424	0.00027011	0.001374	0.0931864		digestion	-3.90299	9.501e-05	0.00057394	0.0327794
humoral immune response	3.55027	0.00038484	0.00190743	0.132768		gamma-aminobutyric acid signaling pathway	-3.6785	0.00023461	0.00129572	0.0809398
anti-apoptosis	3.45219	0.00055605	0.00255917	0.191836		G-protein signaling, coupled to cyclic nucleotide second messenger	-3.64959	0.00026266	0.00137225	0.0906188
regulation of apoptosis	3.44424	0.00057267	0.00257439	0.197572		protein amino acid phosphorylation	-3.5043	0.00045781	0.00221237	0.157943
acute-phase response	3.38895	0.00070161	0.00294833	0.242056		muscle contraction	-3.45597	0.00054832	0.00255917	0.189171
protein ubiquitination	3.20954	0.00132947	0.00546784	0.458666		cell communication	-3.42702	0.00061025	0.00268098	0.210537
JAK-STAT cascade	3.03247	0.00242563	0.00919903	0.836843		exocytosis	-3.41791	0.00063104	0.00271068	0.217707
DNA repair	3.03229	0.00242703	0.00919903	0.837326		alcohol metabolism	-3.18899	0.00142773	0.00574964	0.492566
response to unfolded protein	3.00546	0.00265175	0.00965882	0.914855		G-protein coupled receptor protein signaling pathway	-3.10207	0.00192174	0.00758116	0.663001
protein metabolism	3.00018	0.00269824	0.00965882	0.930894		transmembrane receptor protein tyrosine kinase signaling pathway	-3.00688	0.00263948	0.00965882	0.910619

## Sheet: ART
UP-REGULATED PATHWAYS						DOWN-REGULATED PATHWAYS
ARTa
NAME	Z-SCORE	P-VALUE	q-VALUE	Bonferroni		NAME	Z-SCORE	P-VALUE	q-VALUE	Bonferroni
immune response	5.84165	1e-08	5.8e-07	1.78e-06		cellular defense response	-4.93701	7.9e-07	1.775e-05	0.00027368
antigen presentation, endogenous antigen	5.35027	9e-08	4.91e-06	3.03e-05		signal transduction	-4.84577	1.26e-06	1.827e-05	0.00043513
ER to Golgi transport	5.05562	4.3e-07	1.599e-05	0.000148		G-protein coupled receptor protein signaling pathway	-4.8188	1.44e-06	1.827e-05	0.00049826
glycolysis	4.99561	5.9e-07	1.64e-05	0.00020235		cell differentiation	-4.11008	3.955e-05	0.00031599	0.0136455
ubiquitin-dependent protein catabolism	4.84761	1.25e-06	1.827e-05	0.0004311		cell-cell signaling	-3.54674	0.00039003	0.00218122	0.134561
antigen processing, endogenous antigen via MHC class I	4.8152	1.47e-06	1.827e-05	0.00050732		muscle contraction	-3.48175	0.00049816	0.00265324	0.171864
nuclear mRNA splicing, via spliceosome	4.73746	2.16e-06	2.421e-05	0.00074663		oxygen transport	-3.45265	0.00055511	0.00282219	0.191513
tricarboxylic acid cycle	4.61436	3.94e-06	3.723e-05	0.00136037		development	-3.21493	0.00130477	0.00477346	0.450146
ubiquitin cycle	4.61165	3.99e-06	3.723e-05	0.0013782		calcium ion transport	-3.01225	0.00259317	0.00853064	0.894645
antigen presentation, exogenous antigen	4.20434	2.618e-05	0.00022528	0.00903352		perception of smell	-2.93826	0.00330062	0.0105477	1
protein transport	4.05288	5.059e-05	0.00037723	0.0174539		cation transport	-2.90629	0.00365747	0.0113634	1
spliceosome assembly	3.90432	9.449e-05	0.00066053	0.0325989		feeding behavior	-2.76062	0.00576912	0.0160723	1
protein folding	3.88596	0.00010193	0.00067061	0.035165		G-protein signaling, coupled to cyclic nucleotide second messenger	-2.75375	0.00589161	0.0160723	1
antigen processing, exogenous antigen via MHC class II	3.8078	0.00014021	0.00087124	0.0483726		regulation of blood pressure	-2.69992	0.00693555	0.0180402	1
response to virus	3.74177	0.00018273	0.00107569	0.0630419		muscle development	-2.66798	0.00763083	0.0189665	1
protein catabolism	3.39036	0.00069801	0.00337306	0.240814		antimicrobial humoral response (sensu Vertebrata)	-2.61678	0.00887632	0.0205846	1
small GTPase mediated signal transduction	3.38041	0.00072378	0.00337306	0.249704		phospholipase C activation	-2.58069	0.0098604	0.0216249	1
RNA splicing	3.36205	0.00077366	0.00346131	0.266914		phototransduction	-2.5519	0.0107138	0.022479	1
glutamine metabolism	3.32941	0.00087031	0.00373453	0.300256		defense response to bacteria	-2.47088	0.0134782	0.0274094	1
humoral immune response	3.31959	0.00090151	0.00373453	0.311021		nucleosome assembly	-2.4559	0.0140533	0.0278086	1
cytokinesis	3.23783	0.00120443	0.00474279	0.415529		proteolysis and peptidolysis	-2.45288	0.0141718	0.0278086	1
mRNA processing	3.2319	0.00122971	0.00474279	0.42425		Notch signaling pathway	-2.44238	0.0145907	0.028137	1
positive regulation of I-kappaB kinase/NF-kappaB cascade	3.21094	0.00132302	0.00477346	0.456442		perception of sound	-2.38061	0.0172842	0.0315313	1
intracellular protein transport	3.17012	0.00152377	0.00532597	0.525701		synaptic transmission	-2.35686	0.01843	0.0315313	1
mitochondrial electron transport, NADH to ubiquinone	3.06972	0.00214262	0.00726207	0.739204		chromosome organization and biogenesis (sensu Eukaryota)	-2.35013	0.0187667	0.0315313	1
ATP synthesis coupled proton transport	2.89223	0.00382514	0.0115631	1		epidermis development	-2.34221	0.01917	0.0315313	1
regulation of cyclin dependent protein kinase activity	2.79905	0.00512527	0.0150534	1		morphogenesis	-2.29488	0.0217402	0.0347372	1

## Sheet: ARTa
UP-REGULATED PATHWAYS						DOWN-REGULATED PATHWAYS
ARTb
NAME	Z-SCORE	P-VALUE	q-VALUE	Bonferroni		NAME	Z-SCORE	P-VALUE	q-VALUE	Bonferroni
metabolism	4.60344	4.16e-06	0.00024051	0.00143375		protein biosynthesis	-8.05892	0	0	0
glycolysis	4.58582	4.52e-06	0.00024051	0.00156013		cellular defense response	-6.01311	0	1.9e-07	6.3e-07
alcohol metabolism	4.49746	6.88e-06	0.0002926	0.00237257		antimicrobial humoral response	-4.04491	5.234e-05	0.00159075	0.0180583
neurotransmitter secretion	4.26131	2.032e-05	0.00072058	0.00701153		translational elongation	-3.75684	0.00017207	0.00406729	0.0593643
ubiquitin cycle	3.92022	8.847e-05	0.00235253	0.0305212		chromosome organization and biogenesis	-3.62238	0.0002919	0.00564526	0.100706
protein amino acid phosphorylation	3.71111	0.00020635	0.00438986	0.0711914		cell differentiation	-3.4951	0.00047388	0.00748002	0.163489
glutamine metabolism	3.57697	0.0003476	0.00616232	0.119923		muscle development	-2.97871	0.00289461	0.0324099	0.99864
gamma-aminobutyric acid signaling pathway	3.48494	0.00049225	0.00748002	0.169827		regulation of muscle contraction	-2.93634	0.00332113	0.034537	1
lipid metabolism	3.36538	0.00076438	0.0107932	0.263713		nucleosome assembly	-2.85854	0.00425593	0.0377246	1
tricarboxylic acid cycle	3.34875	0.00081176	0.0107932	0.280057		perception of sound	-2.80894	0.00497056	0.0418087	1
protein catabolism	3.12174	0.00179783	0.0224979	0.620252		circulation	-2.80003	0.00510973	0.0418087	1
protein kinase C activation	3.05137	0.00227801	0.0269231	0.785913		muscle contraction	-2.74088	0.00612752	0.0465553	1
protein polymerization	2.9282	0.00340927	0.034537	1		Notch signaling pathway	-2.56049	0.0104524	0.0717295	1
synaptic transmission	2.90309	0.00369502	0.0357303	1		proteolysis and peptidolysis	-2.50303	0.0123136	0.0818613	1
small GTPase mediated signal transduction	2.86943	0.00411217	0.0377246	1		iron ion homeostasis	-2.45144	0.0142284	0.0917244	1
ATP synthesis coupled proton transport	2.7788	0.00545596	0.0429882	1		cytoskeleton organization and biogenesis	-2.42995	0.015101	0.0944864	1
ER to Golgi transport	2.64458	0.00817933	0.0600014	1		iron ion transport	-2.37815	0.0174	0.0961316	1
homophilic cell adhesion	2.61245	0.00898958	0.0637471	1		morphogenesis	-2.36746	0.0179109	0.0961316	1
regulation of signal transduction	2.41623	0.0156823	0.0953201	1		calcium-dependent cell-cell adhesion	-2.33344	0.019625	0.0966644	1
mitochondrial transport	2.3937	0.0166793	0.0961316	1		nucleocytoplasmic transport	-2.33301	0.0196476	0.0966644	1
proton transport	2.38495	0.0170817	0.0961316	1		actin filament-based movement	-2.32927	0.0198448	0.0966644	1
antigen processing, endogenous antigen via MHC class I	2.36407	0.0180752	0.0961316	1		regulation of blood pressure	-2.32648	0.019993	0.0966644	1
cytokinesis	2.31411	0.0206618	0.0968174	1		cytolysis	-2.30916	0.0209348	0.0968174	1
inactivation of MAPK	2.29146	0.0219371	0.0992939	1		G-protein coupled receptor protein signaling pathway	-2.26039	0.023797	0.105448	1
aromatic compound metabolism	2.23604	0.0253489	0.105448	1		lipid catabolism	-2.25094	0.0243893	0.105448	1
response to wounding	2.23104	0.0256785	0.105448	1		striated muscle contraction	-2.20368	0.0275472	0.110572	1
antigen presentation, endogenous antigen	2.22958	0.0257752	0.105448	1		ossification	-2.15848	0.0308908	0.119484	1
